# Supplementary material for: Myosin light chain kinase and Src control membrane dynamics in volume recovery from cell swelling
Source: PubMed Central journal article supplement — Mol Biol Cell. 2011 Mar 1;22(5):634–50. doi: 10.1091/mbc.E10-06-0514 (PMC3046060; doi:10.1091/mbc.e10-06-0514), 2011-03-01

**S1**  
**A**

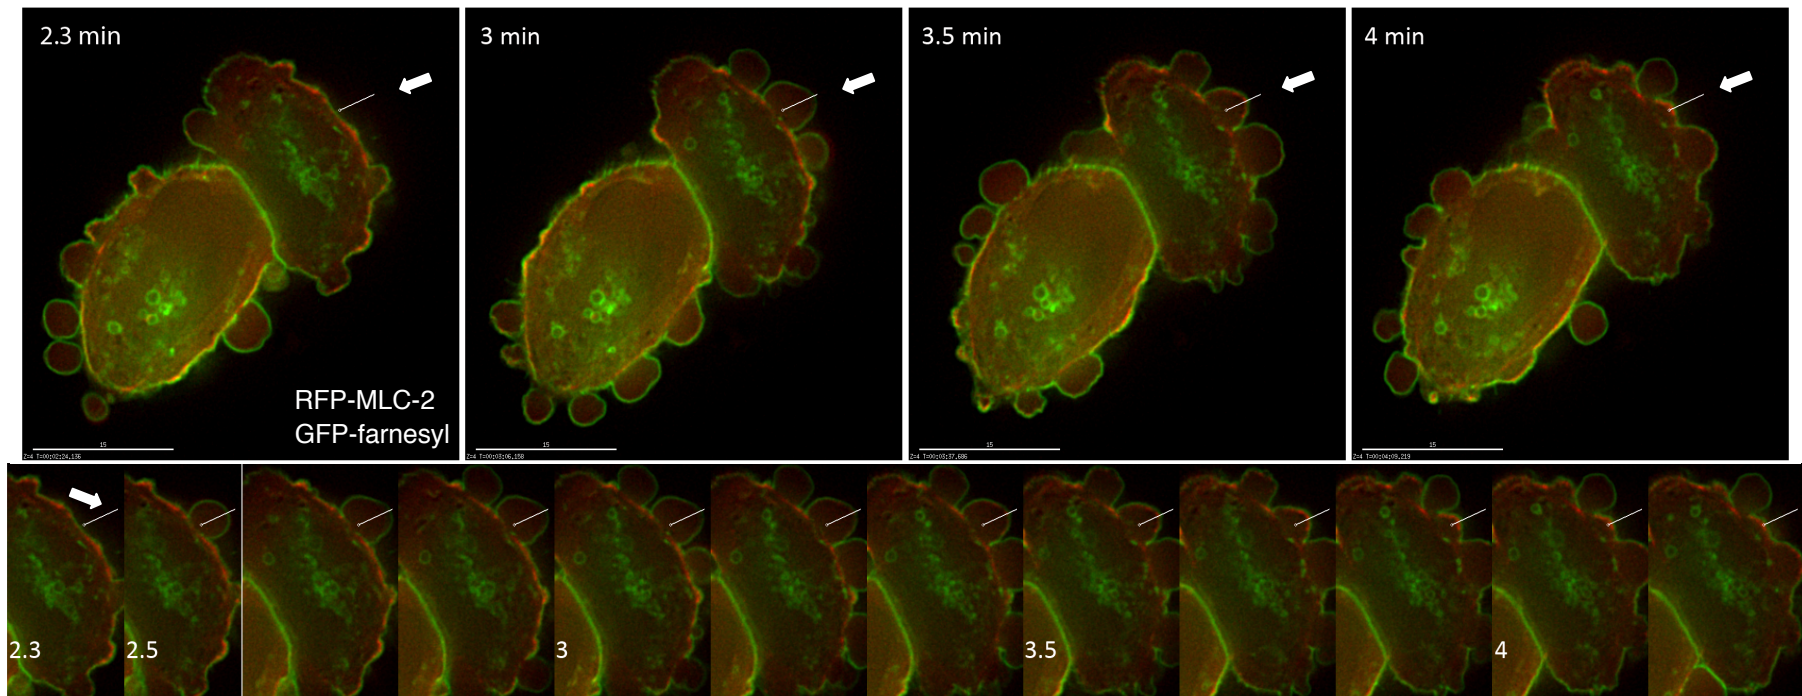

**B**

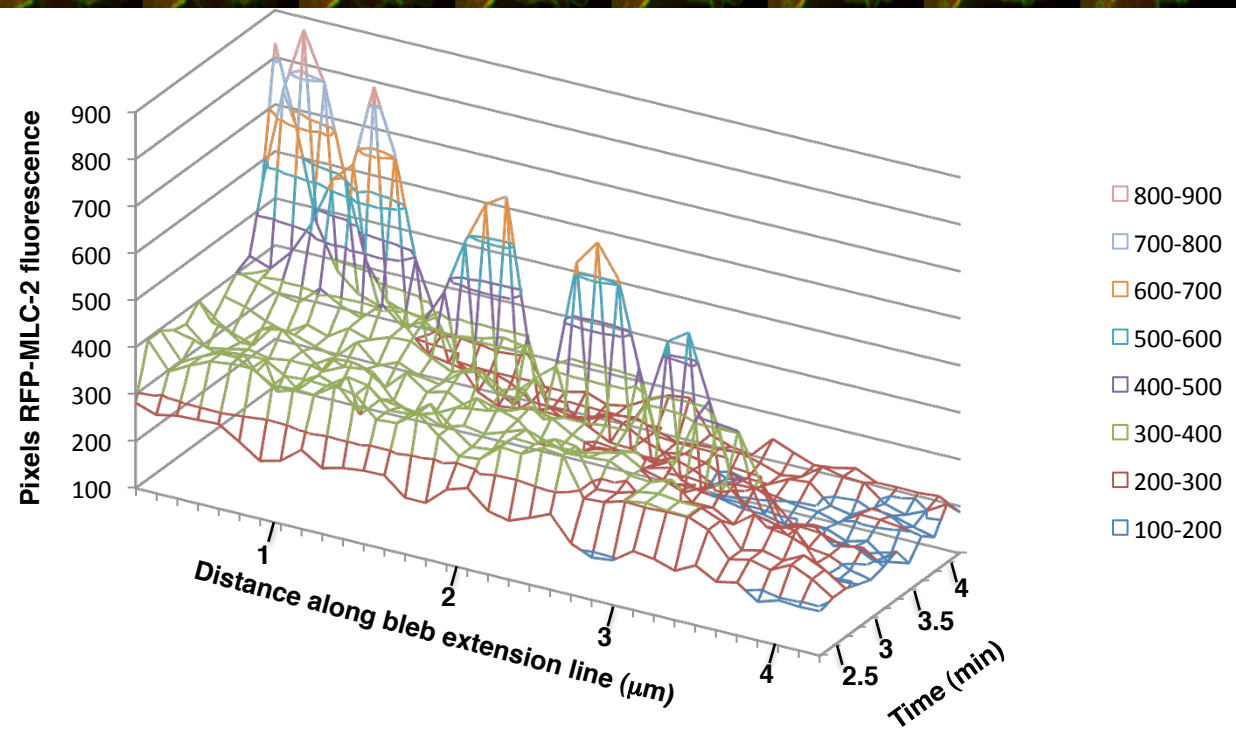

S2

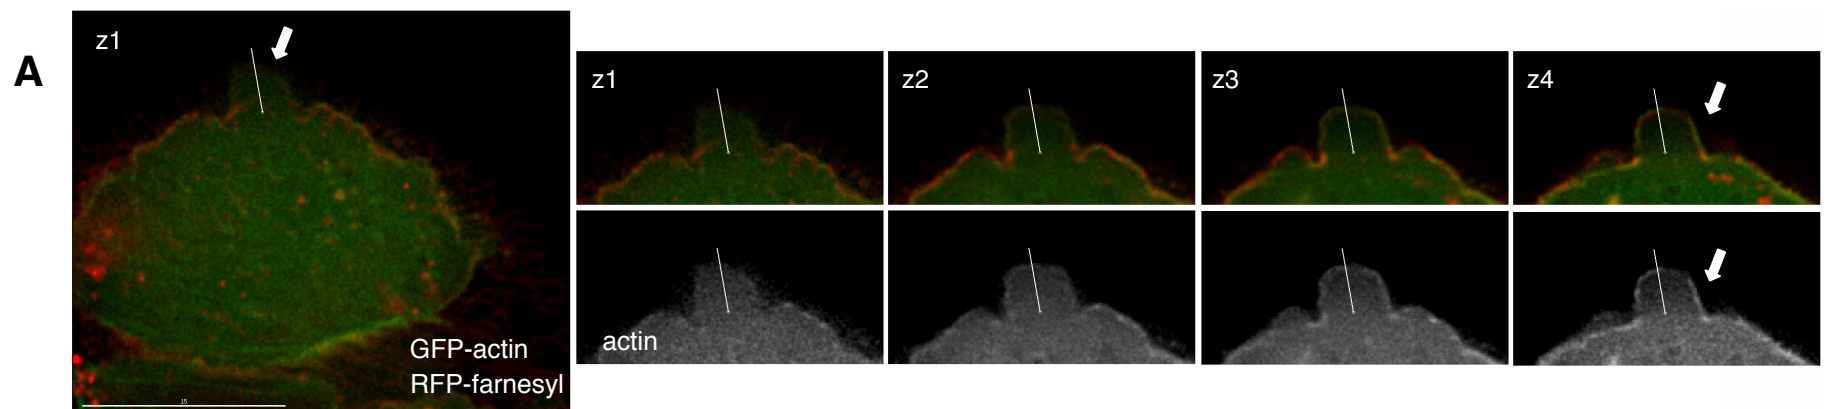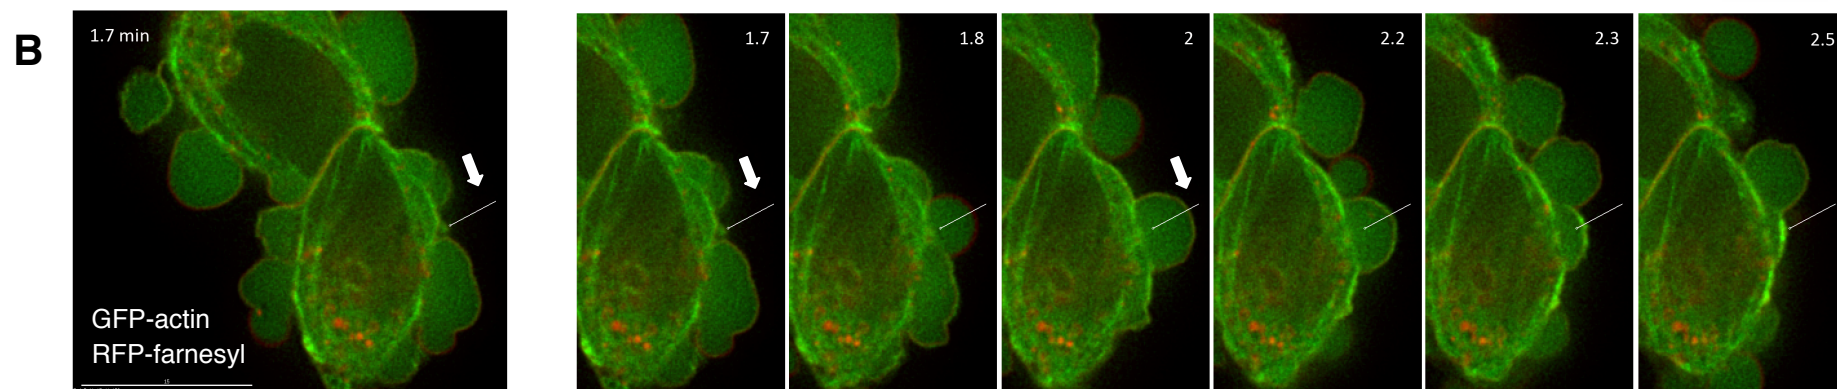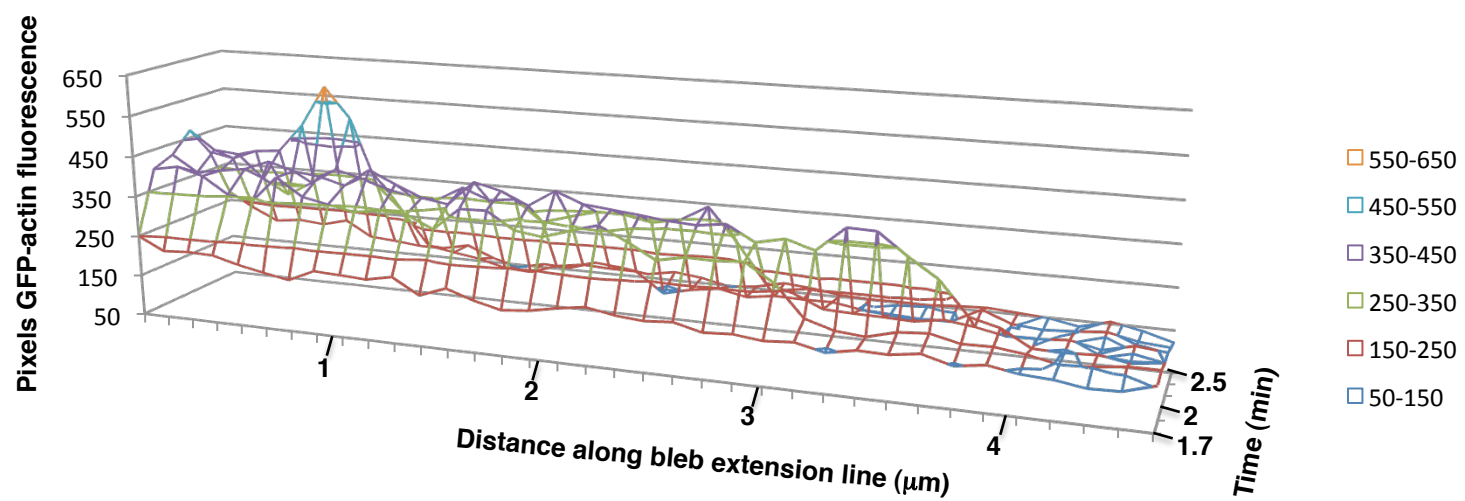



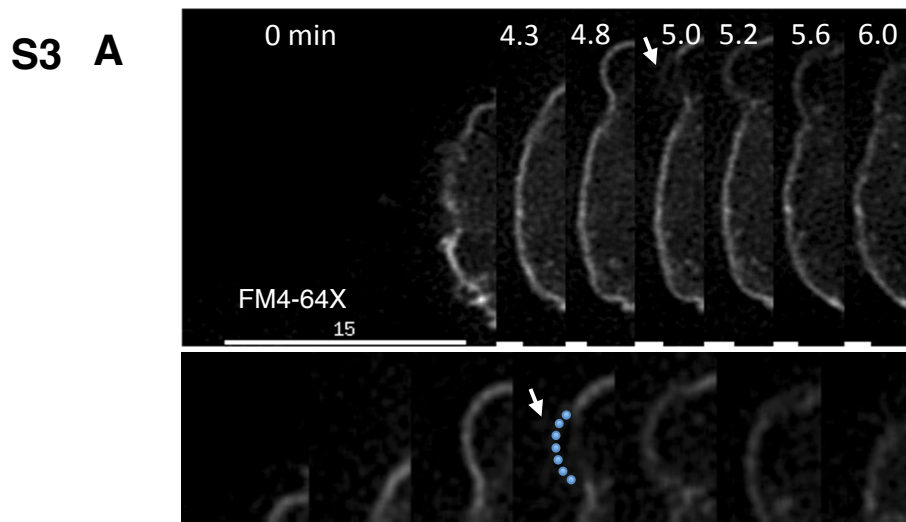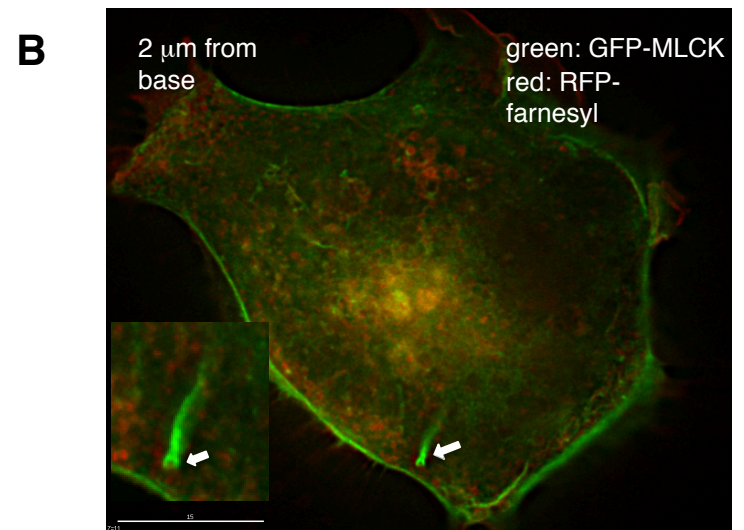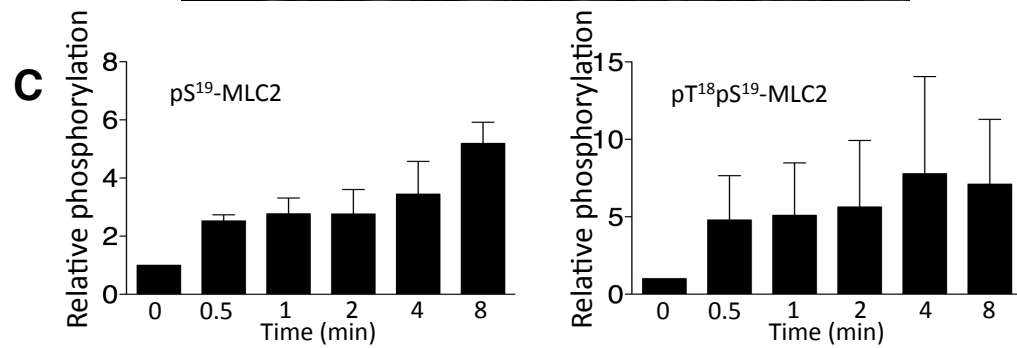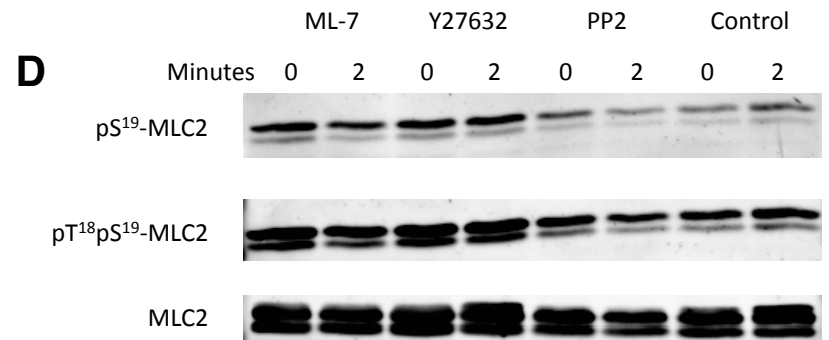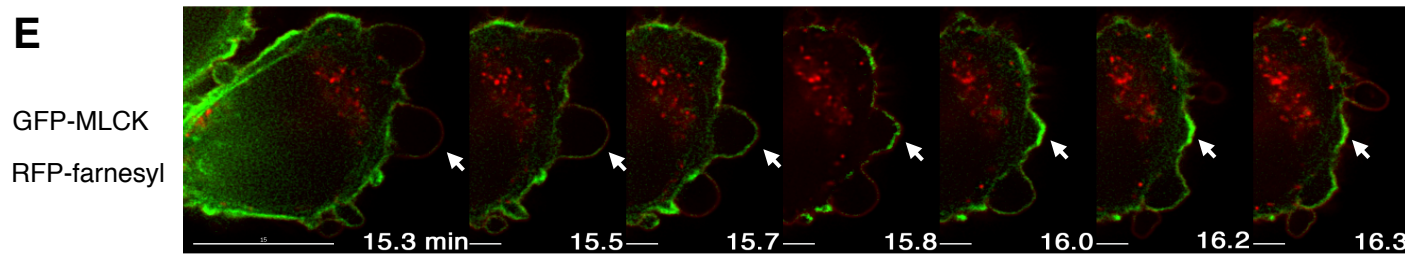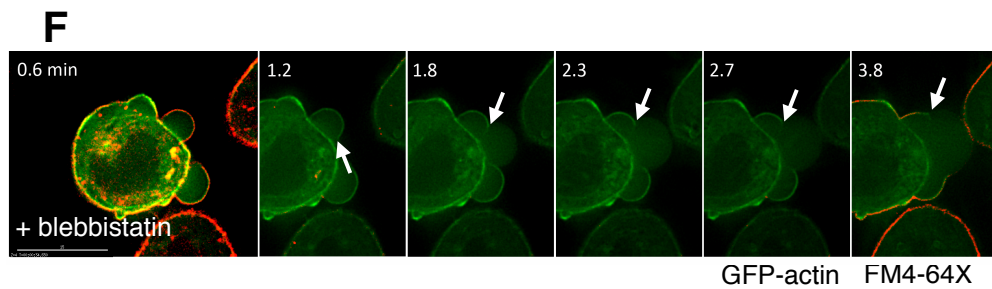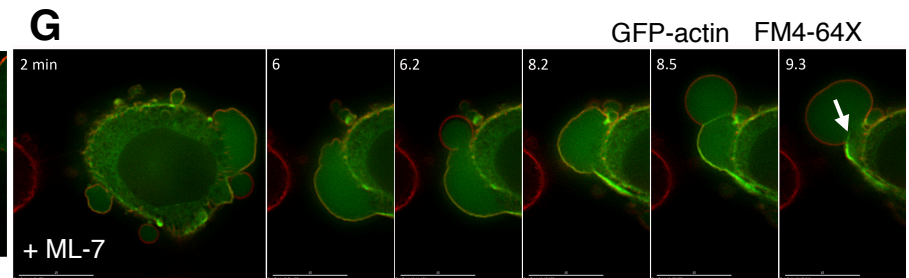

S4

A

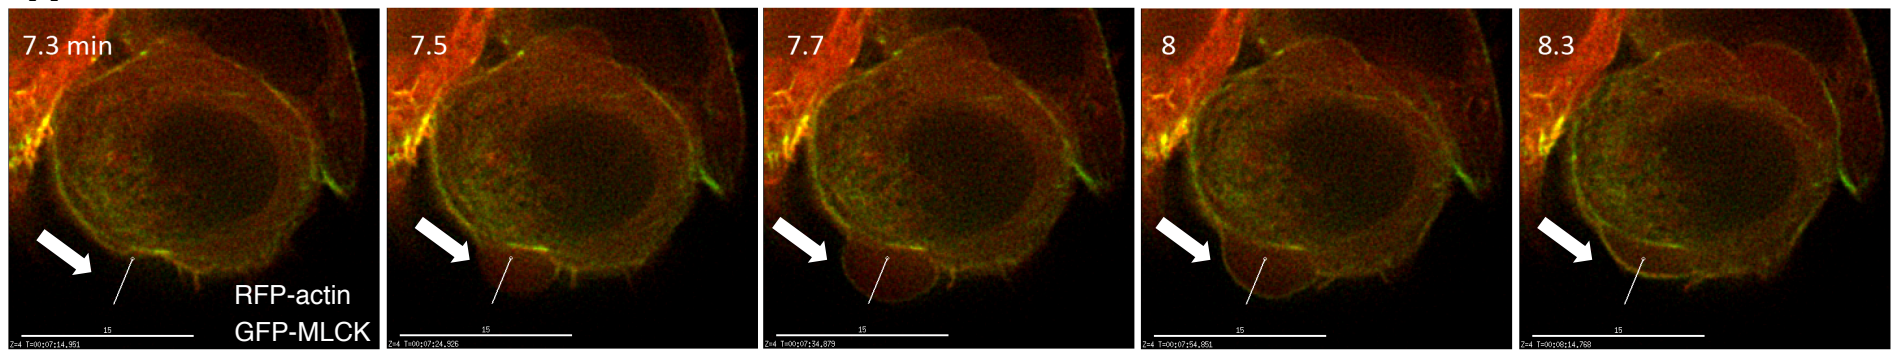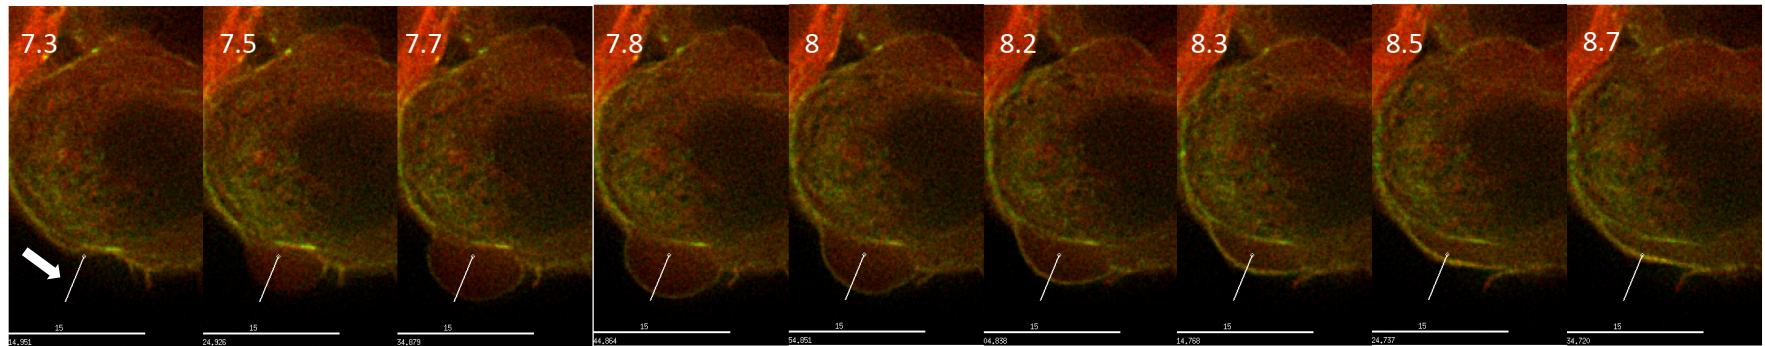

B

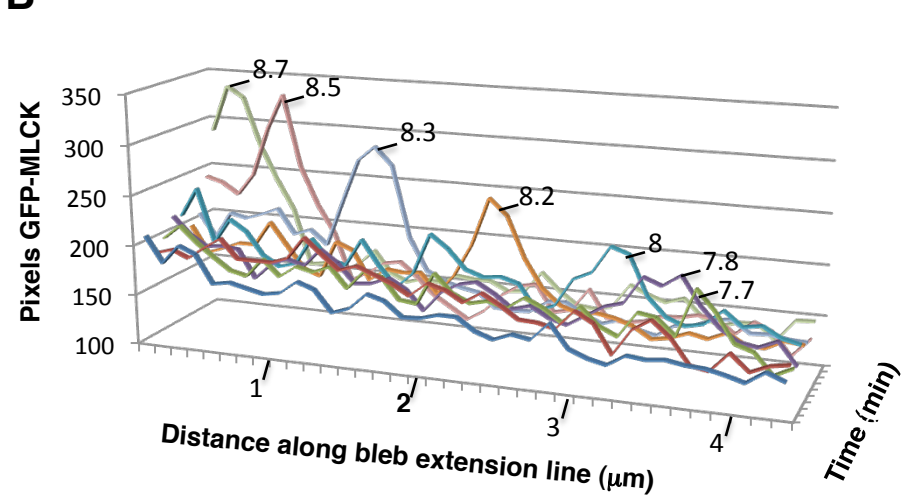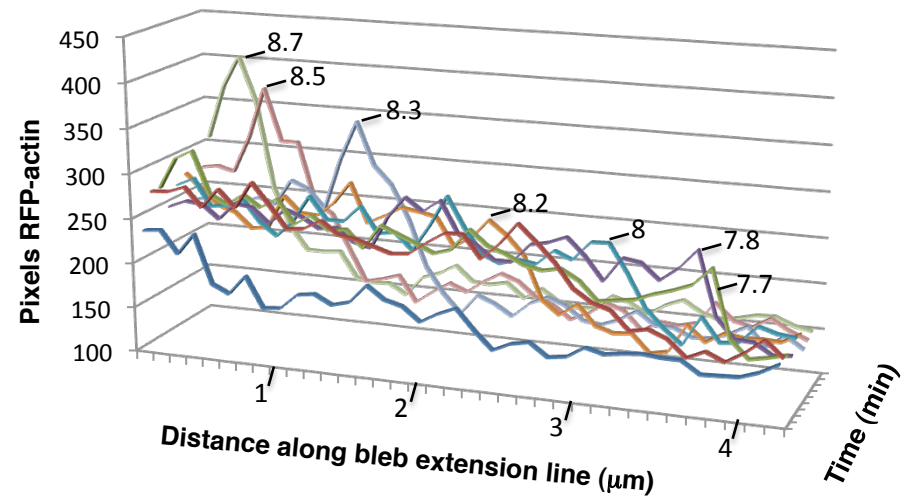



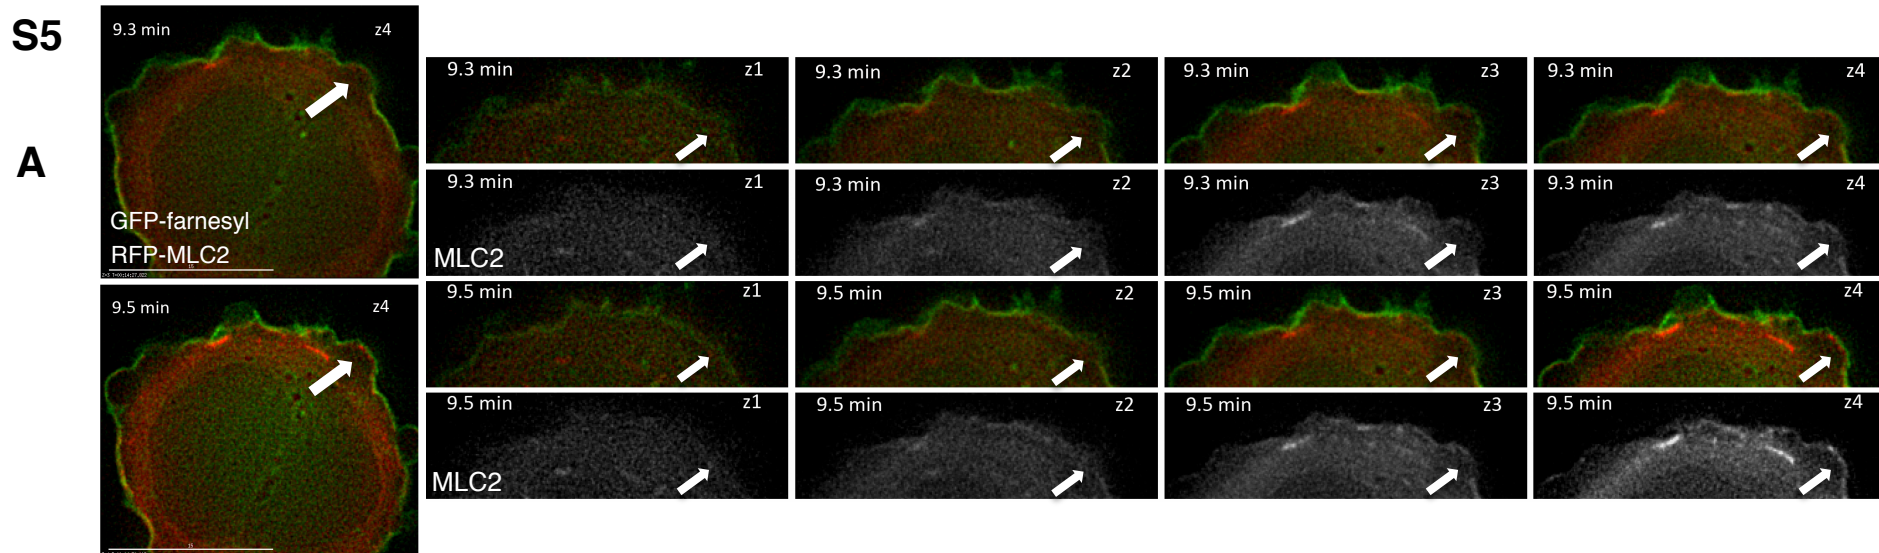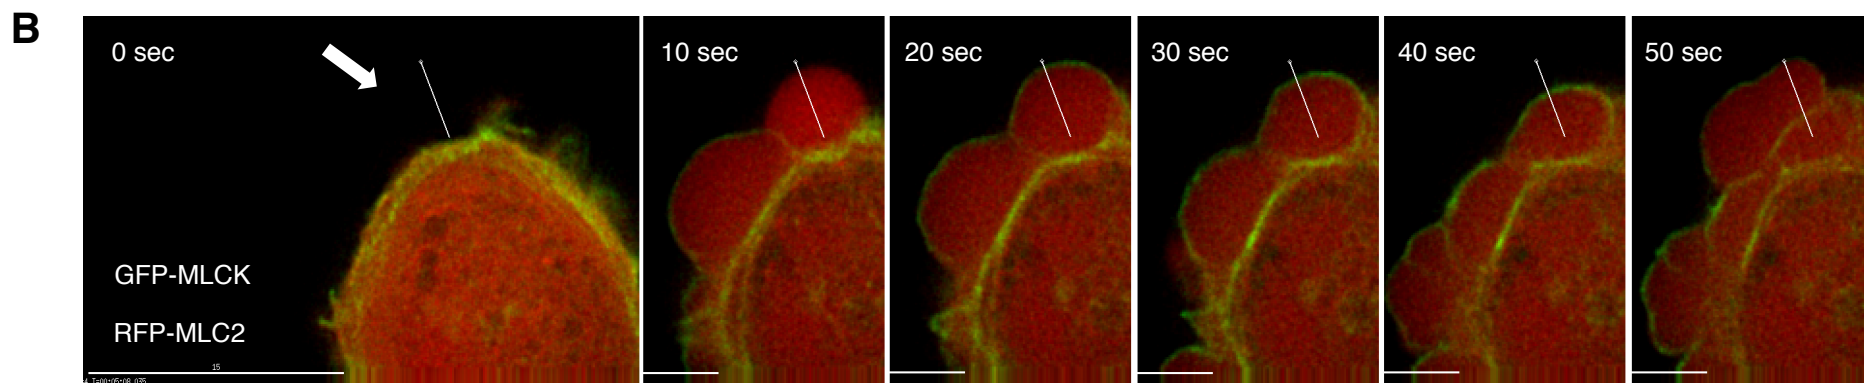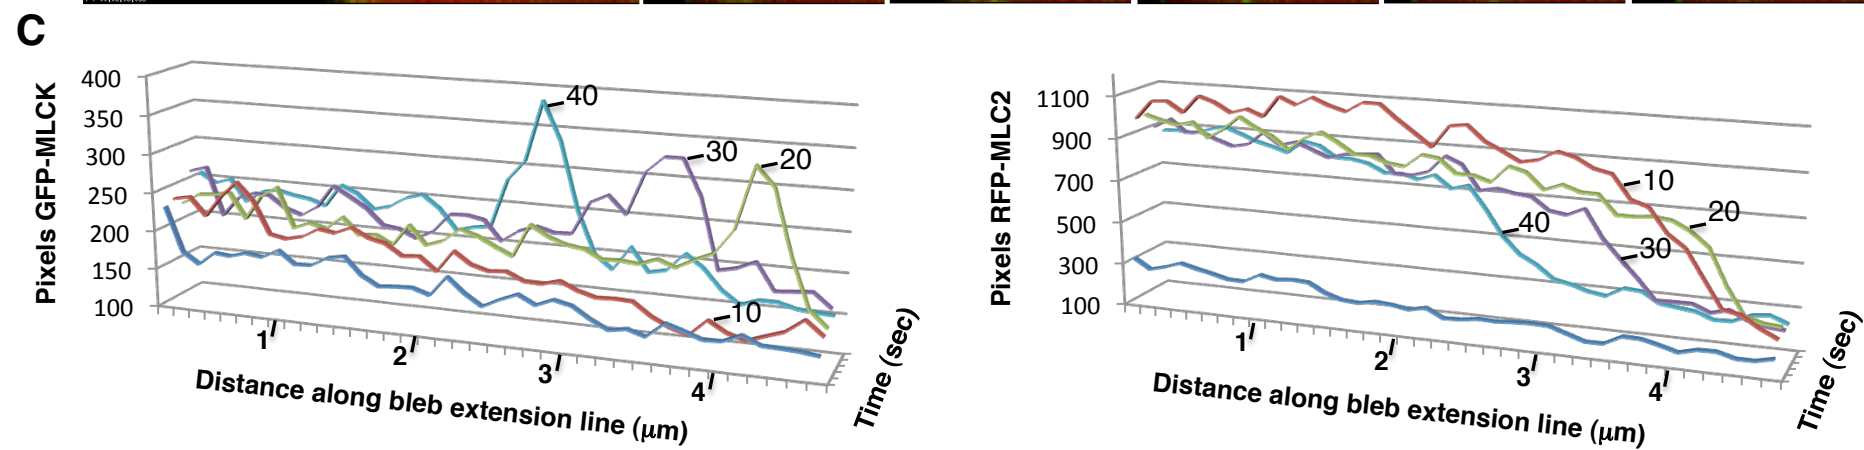

S6

A

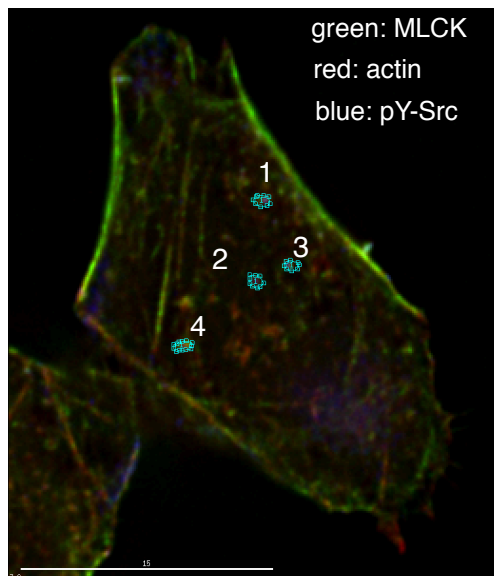

| brightest pY-Src patches | pixels from line profile peak | correlation with MLCK in patch |
|--------------------------|-------------------------------|--------------------------------|
| 1                        | 2947                          | 0.6963                         |
| 2                        | 2064                          | 0.8101                         |
| 3                        | 2667                          | 0.8524                         |
| 4                        | 1553                          | 0.4832                         |

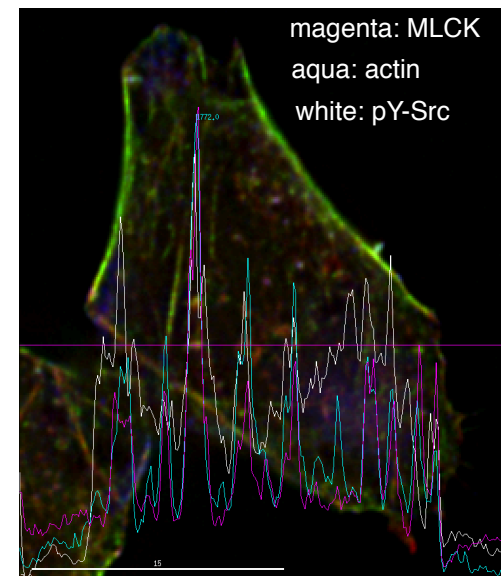

B

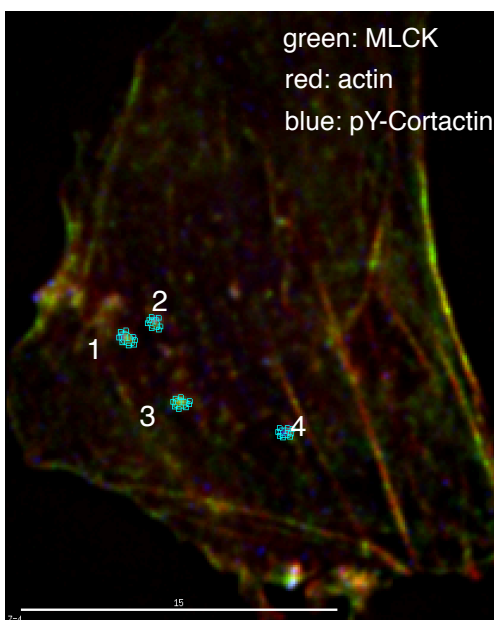

| brightest pY-Cortactin patches | pixels from line profile peak | correlation with MLCK in patch |
|--------------------------------|-------------------------------|--------------------------------|
| 1                              | 7047                          | 0.5045                         |
| 2                              | 6478                          | 0.7676                         |
| 3                              | 4619                          | 0.8038                         |
| 4                              | 9118                          | 0.5959                         |

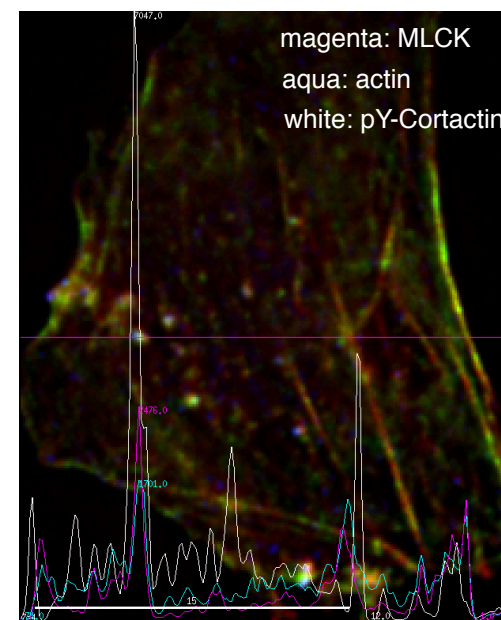



**S7**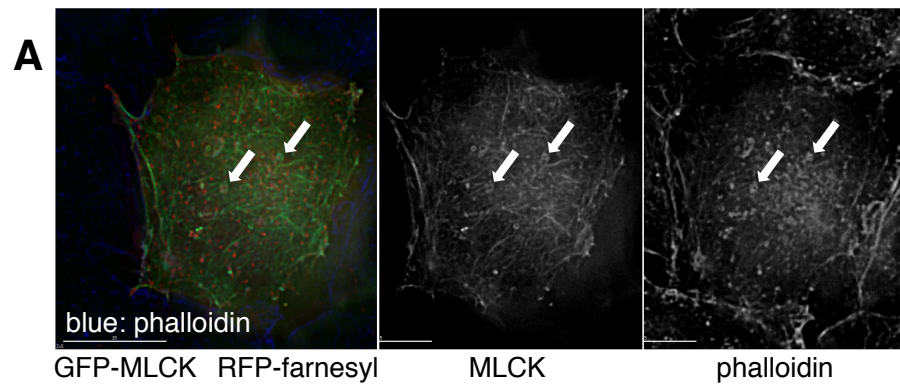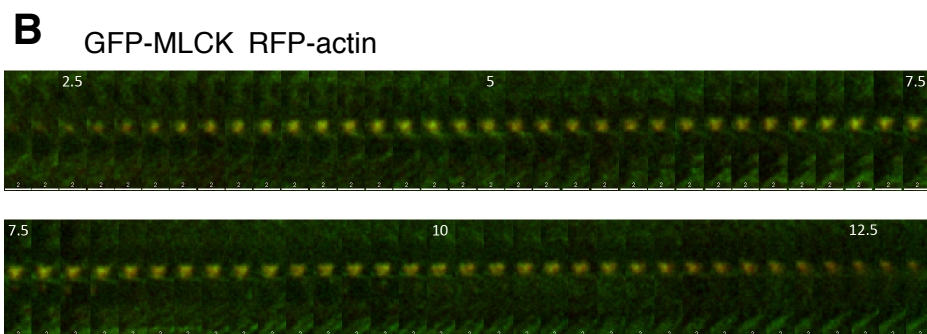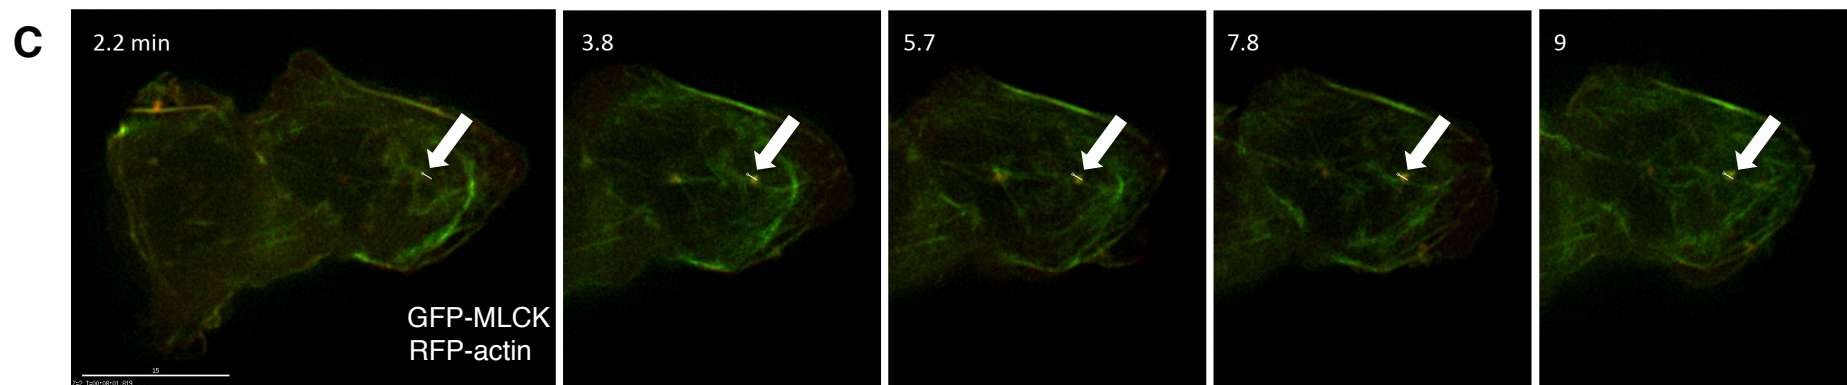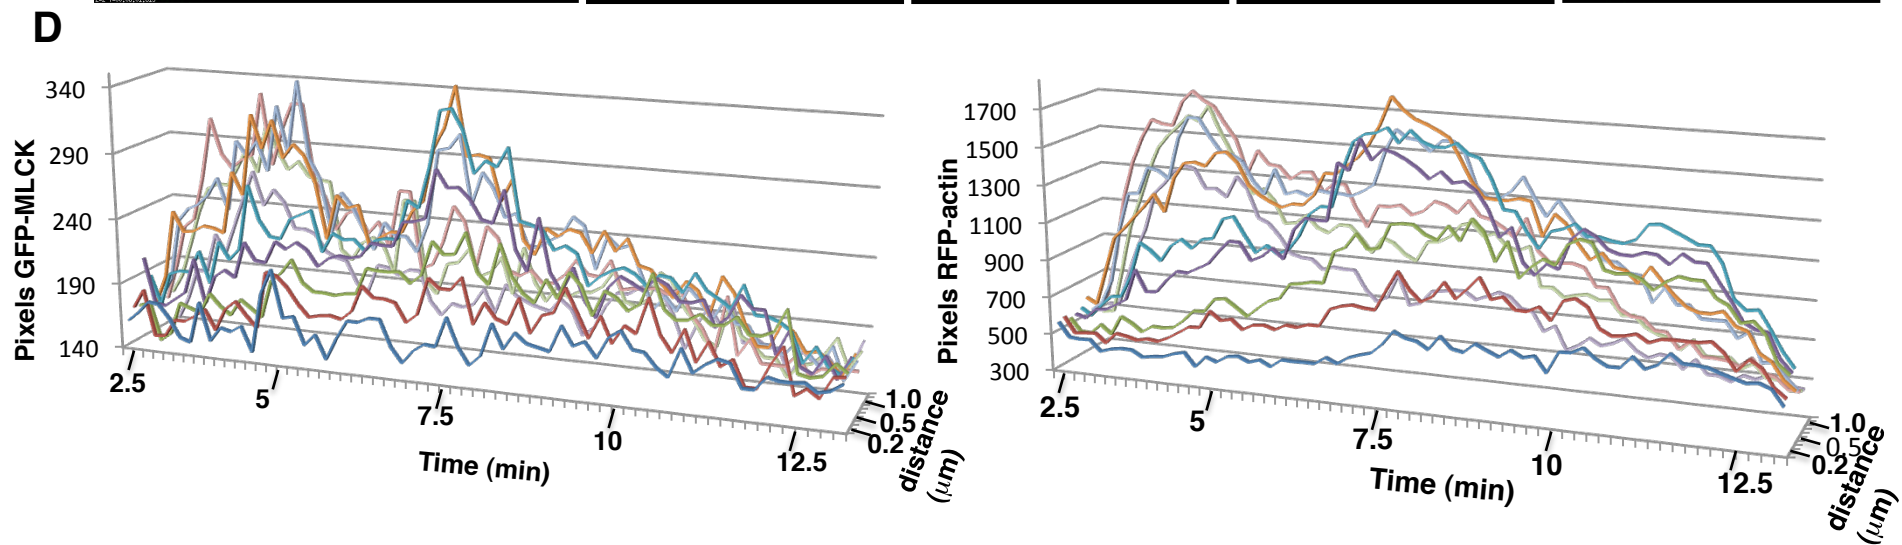

S8

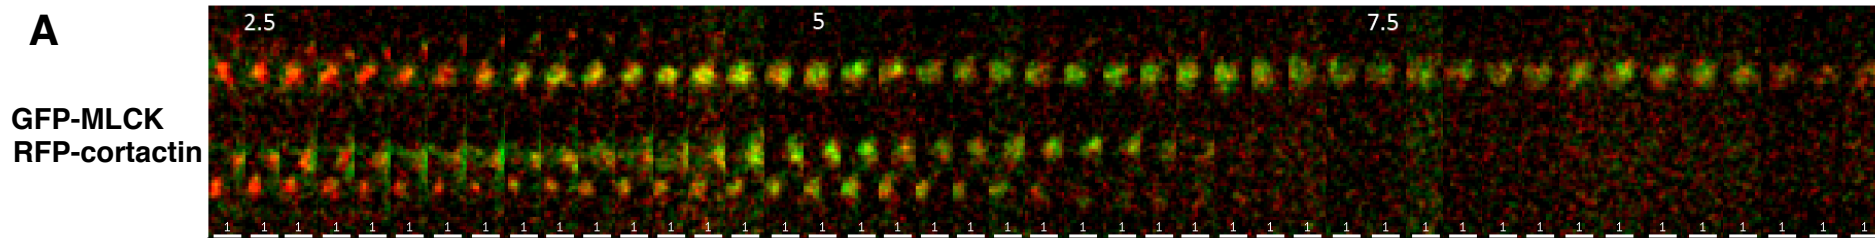

**B**

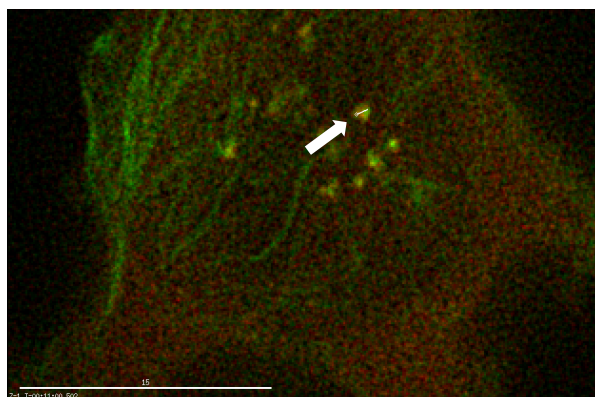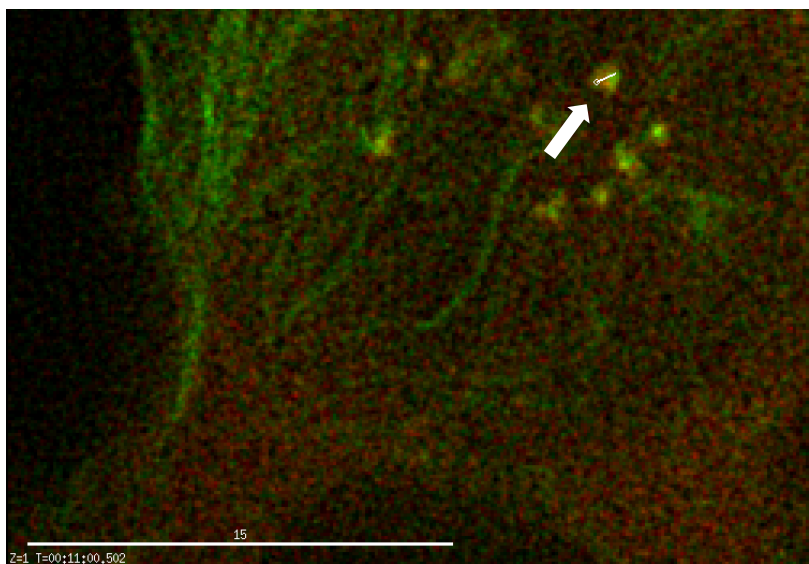

**C**

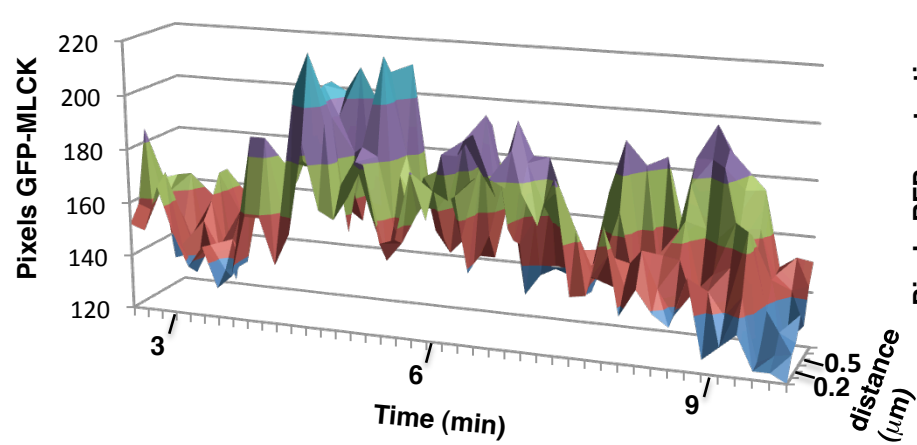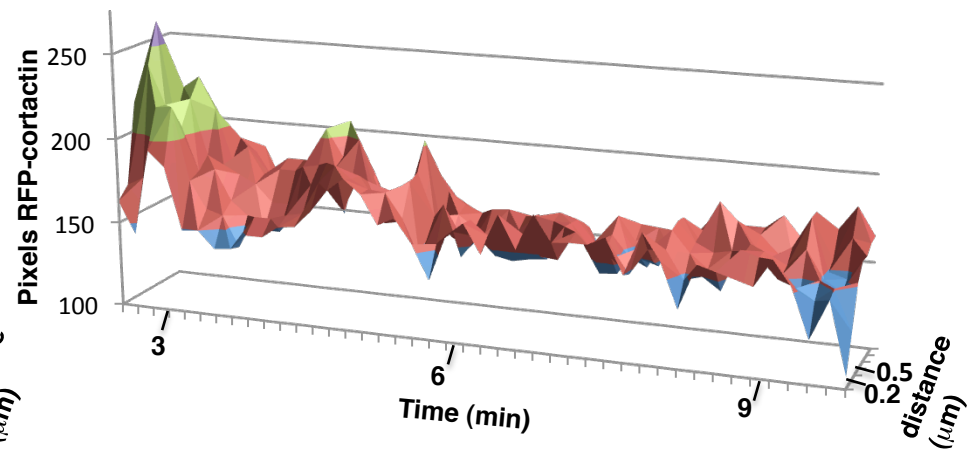



S9

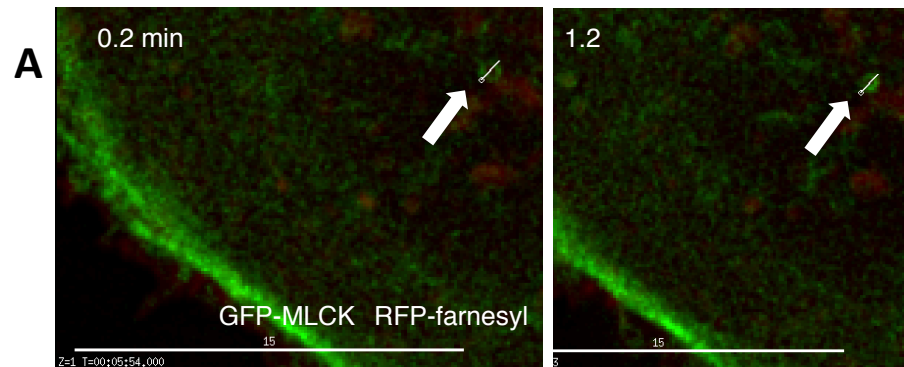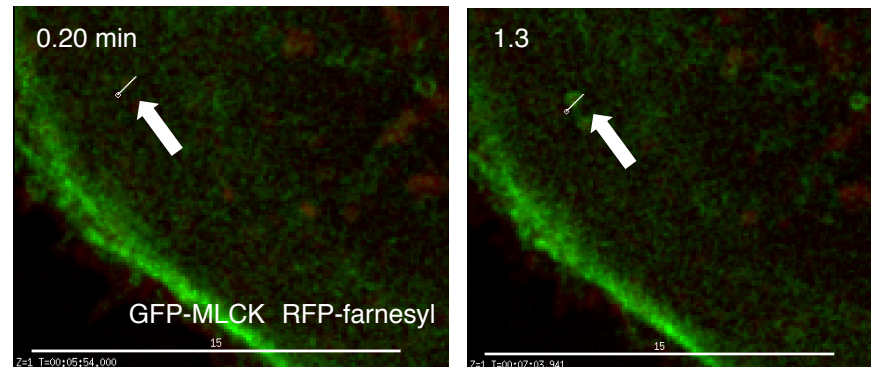

**B**

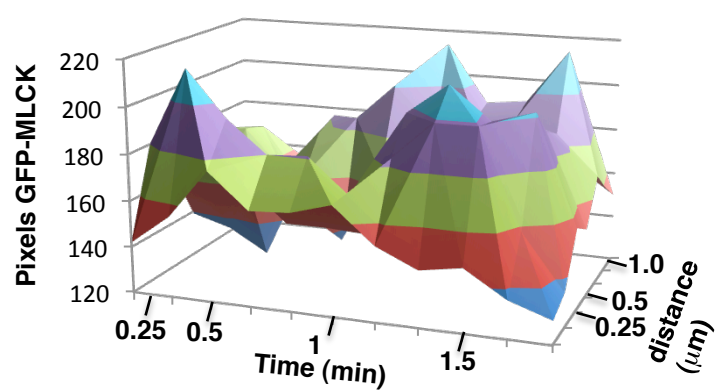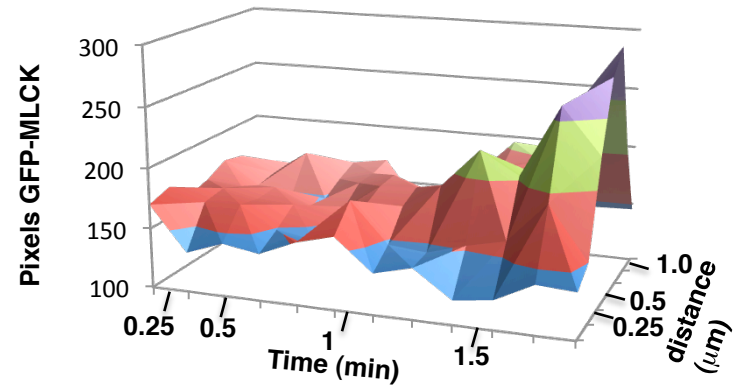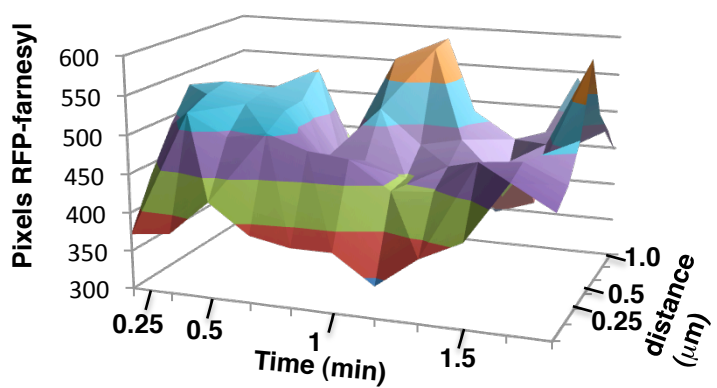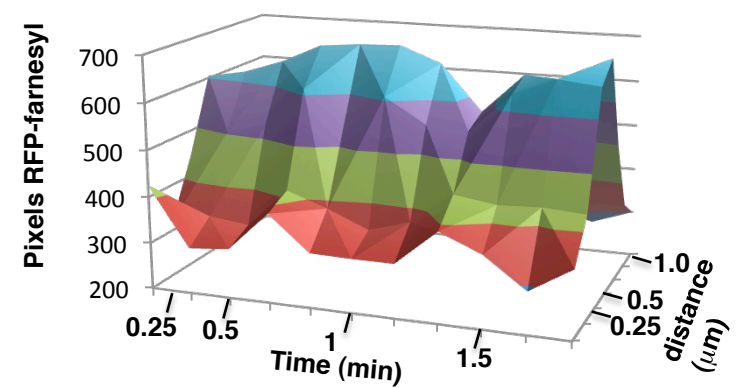

**S10**

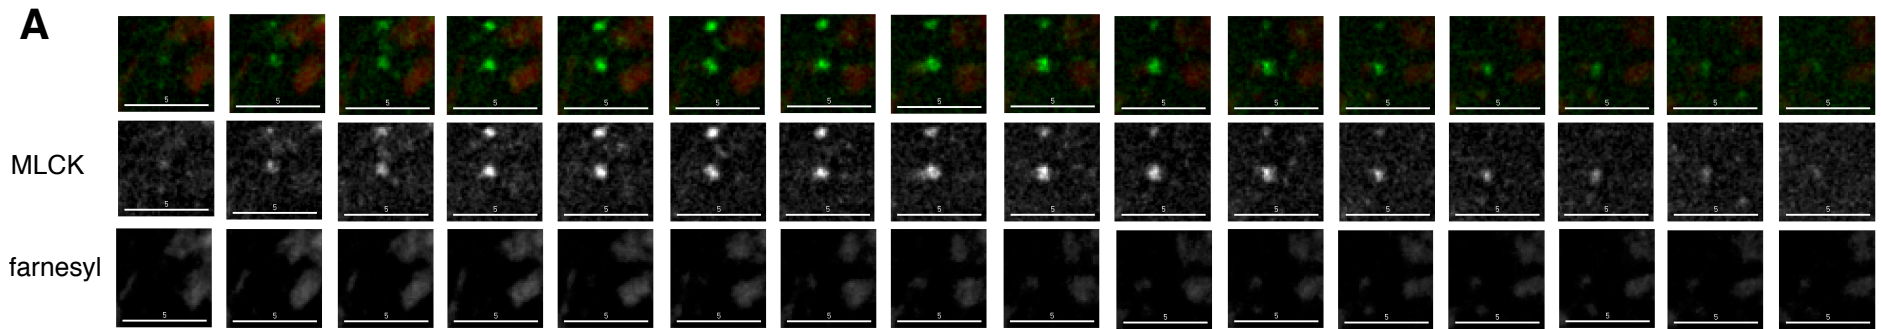

**B**

green: GFP-MLCK  
red: FM-464X  
blue: dextran

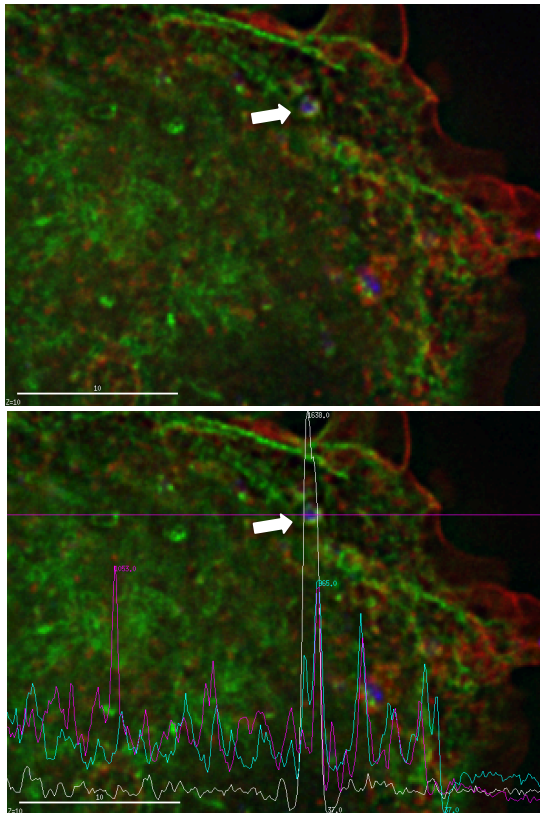

**C**

green: GFP-MLCK  
red: RFP-actin  
blue: dextran

pink line: MLCK  
aqua line: FM4-64X  
white line: dextran

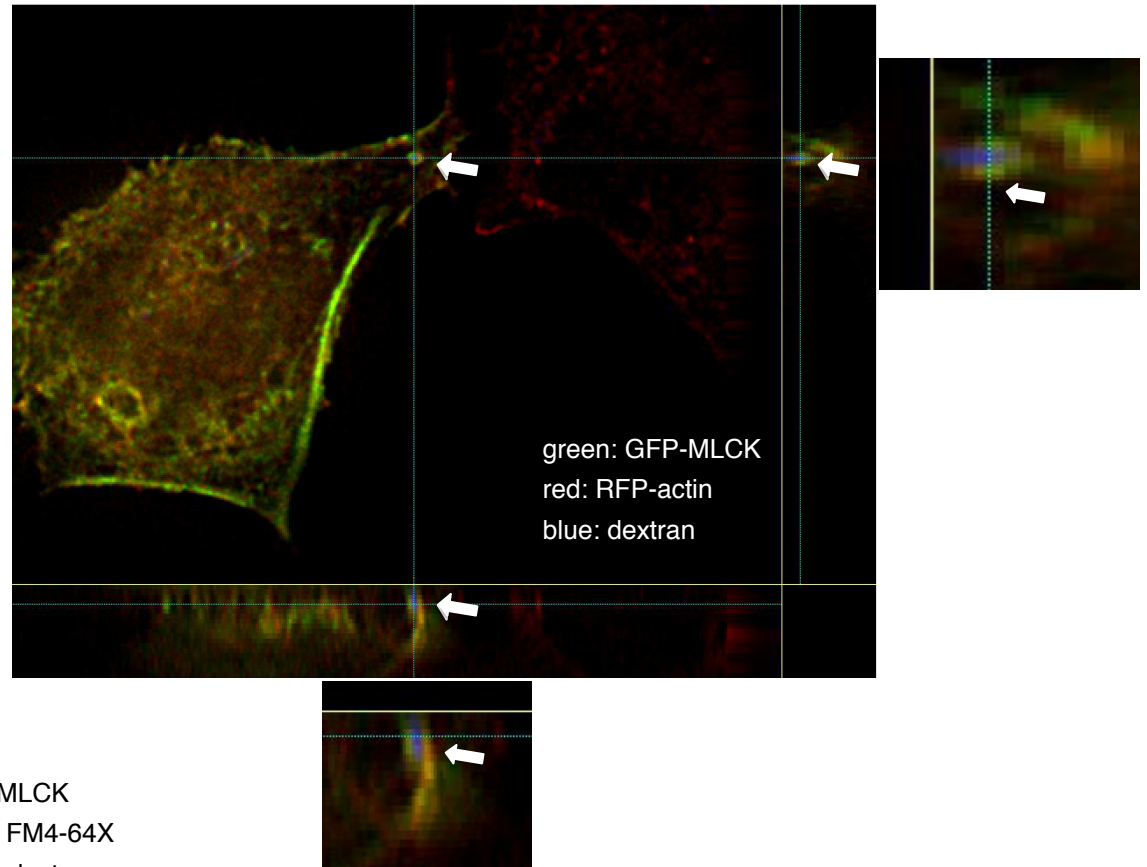



S11

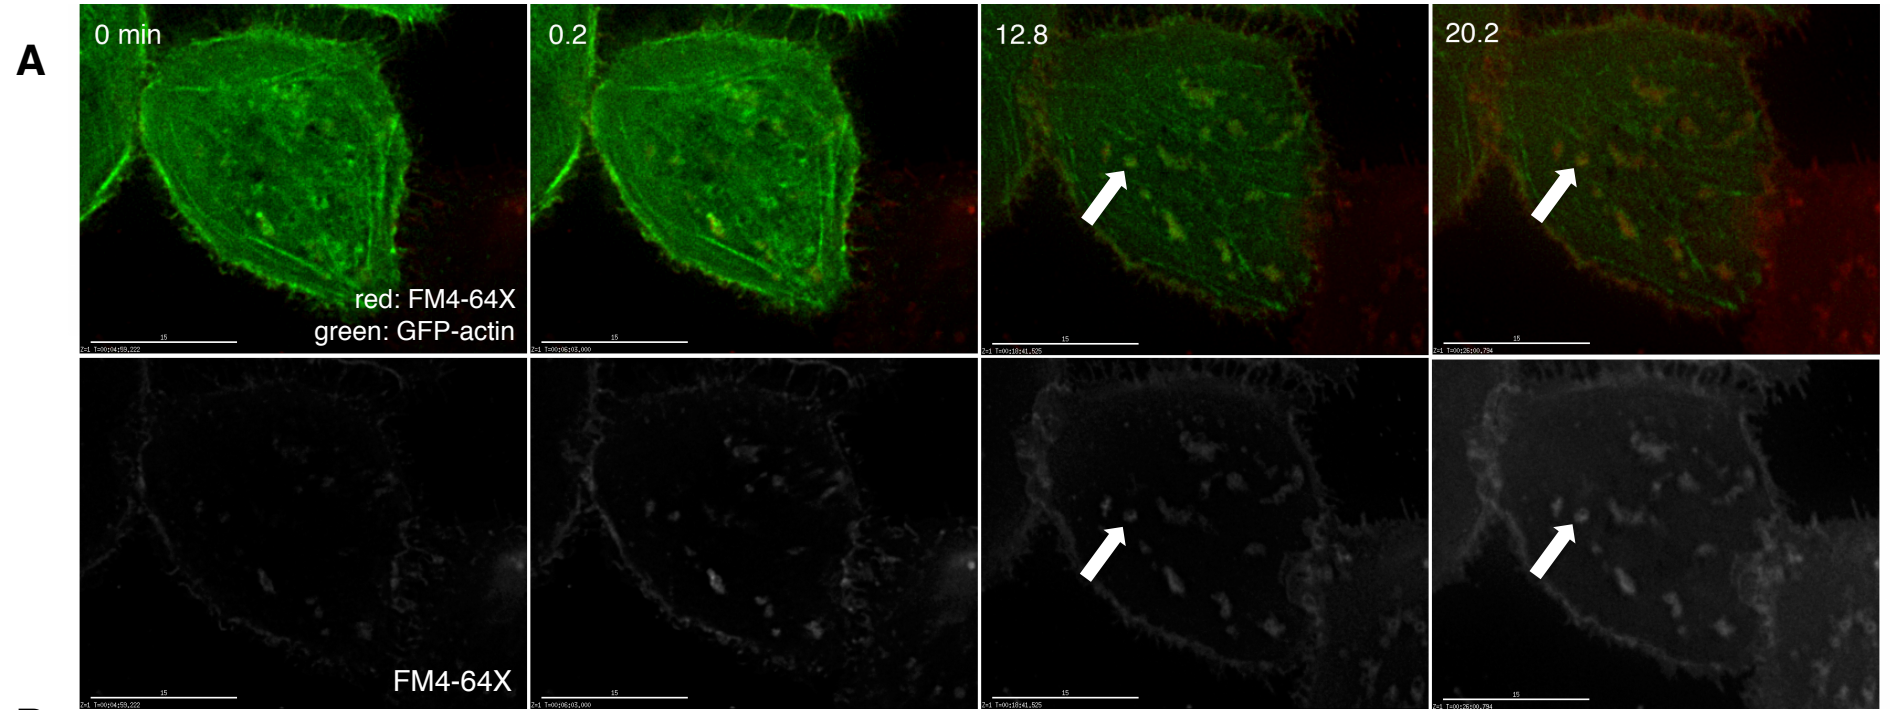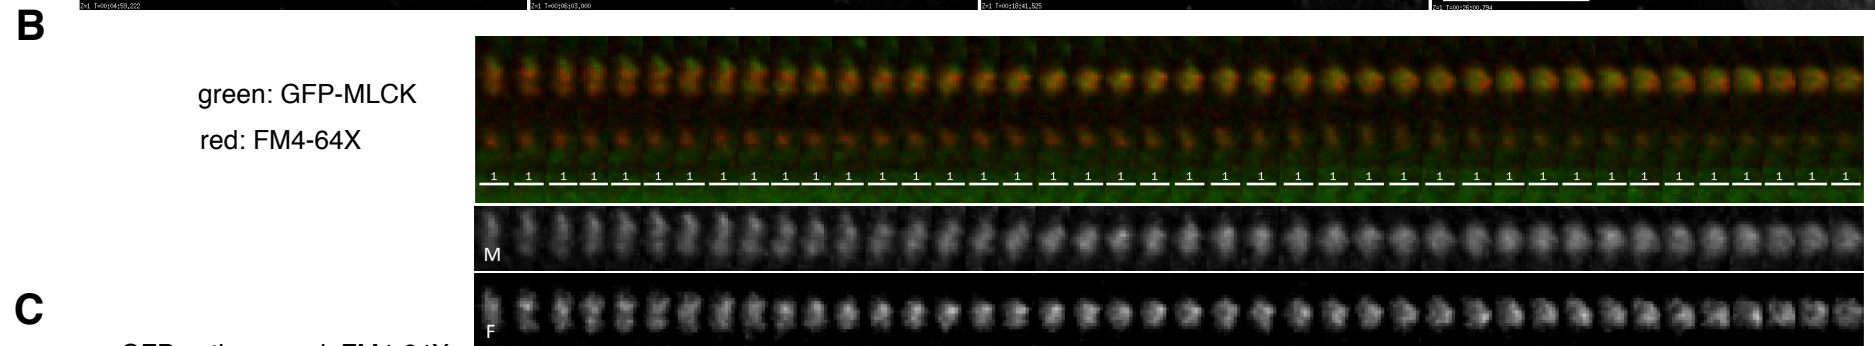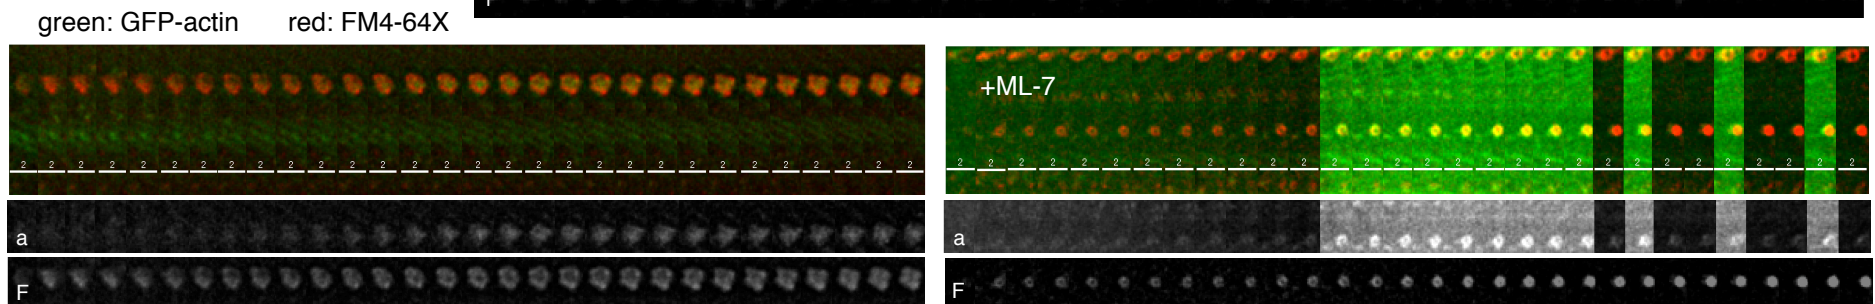

# S12

## A

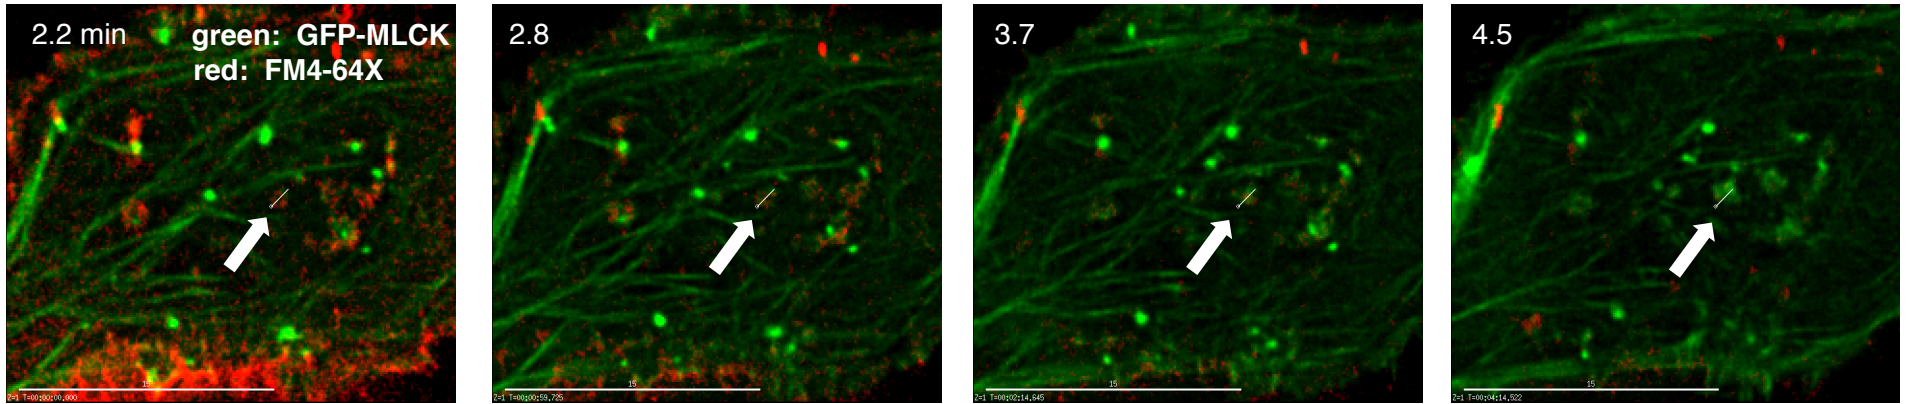

## B

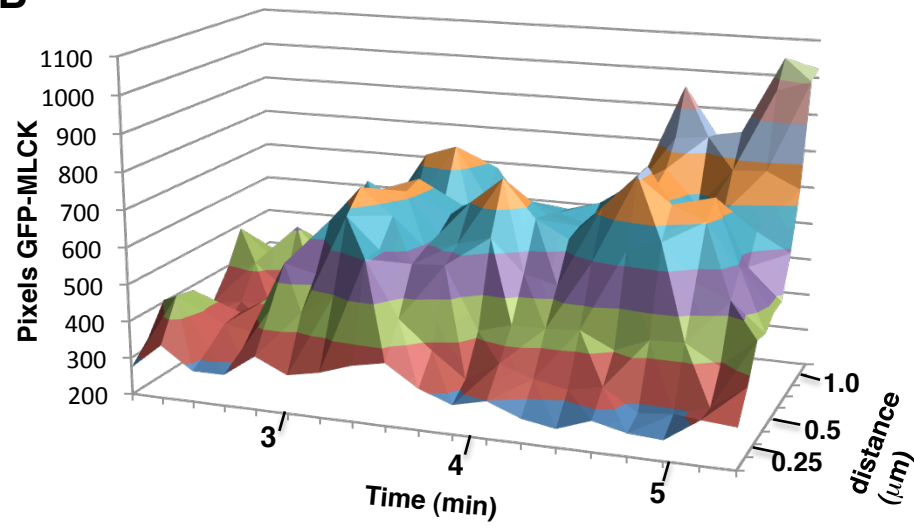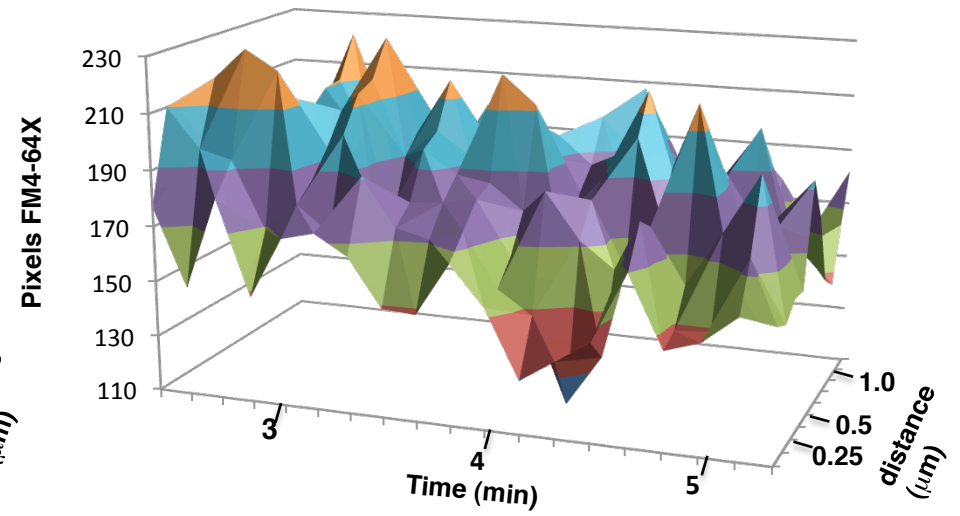

# S13 Peak response

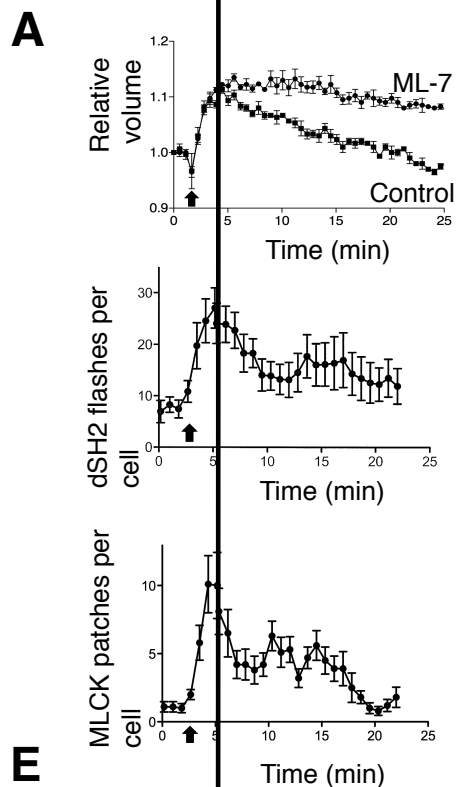

| time after swelling | volume      | Src (dSH2)flashes | MLCK patches |
|---------------------|-------------|-------------------|--------------|
| peak                | 2.7-3.4 min | 2.5 min           | 1.7-2.5 min  |
| half maximum        | 1.2-1.7 min | 0-0.8 min         | 0-0.8 min    |

**B**

|                 | MLCK ring | RFP-farn ring | MLCK & farn rings | MLCK ring & farn lumen |
|-----------------|-----------|---------------|-------------------|------------------------|
|                 |           |               |                   |                        |
| <b>HYPO</b>     | 34        | 30            | 5                 | 1                      |
| <b>ML-7</b>     | 26        | 45            | 15                | 0                      |
| <b>Dynasore</b> | 101       | 62            | 27                | 10                     |

**C**

|             | actin ring | FM4-64X ring | actin & FM ring |
|-------------|------------|--------------|-----------------|
|             |            |              |                 |
| <b>ML-7</b> | 16         | 40           | 8               |

**D**

|                                    | HYPO | ML-7 | Dynasore |
|------------------------------------|------|------|----------|
| <b>% MLCK assoc farnesyl rings</b> | 15   | 58   | 27       |
| <b>% actin assoc FM4-64X rings</b> |      | 50   |          |

**E**

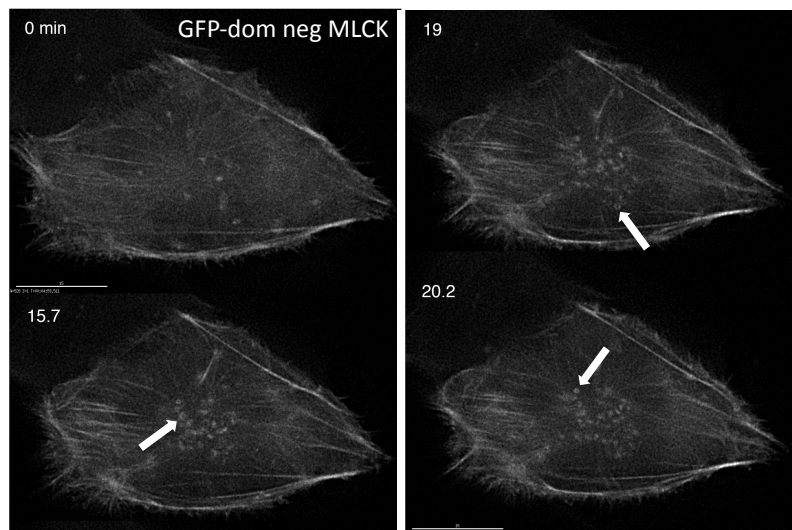

**F**

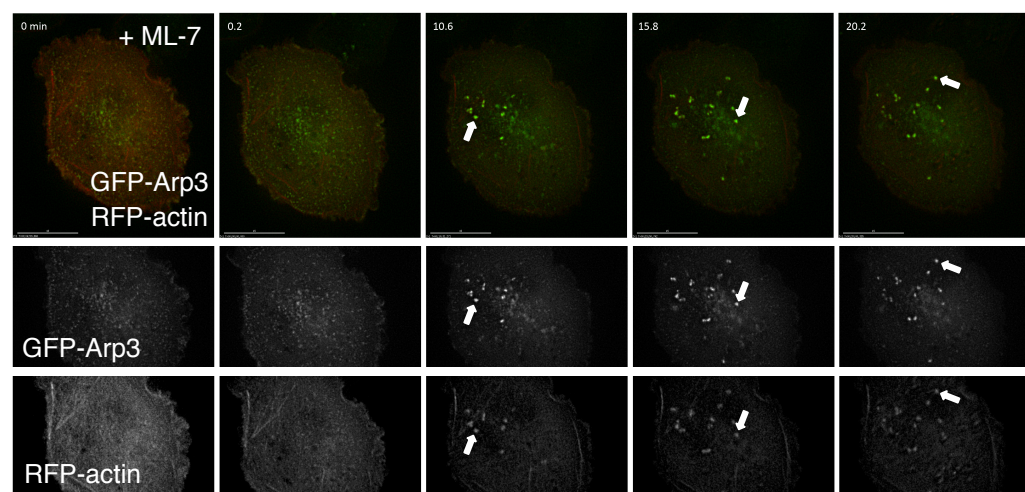



S14

A

| dynamain patches | correlation (with actin) | dynamain dots | correlation (with actin) |
|------------------|--------------------------|---------------|--------------------------|
| 1                | 0.4598                   | A             | -0.0757                  |
| 2                | 0.8374                   | B             | 0.0164                   |
| 3                | 0.7810                   | C             | -0.3499                  |
| 4                | 0.7739                   | D             | 0.2015                   |

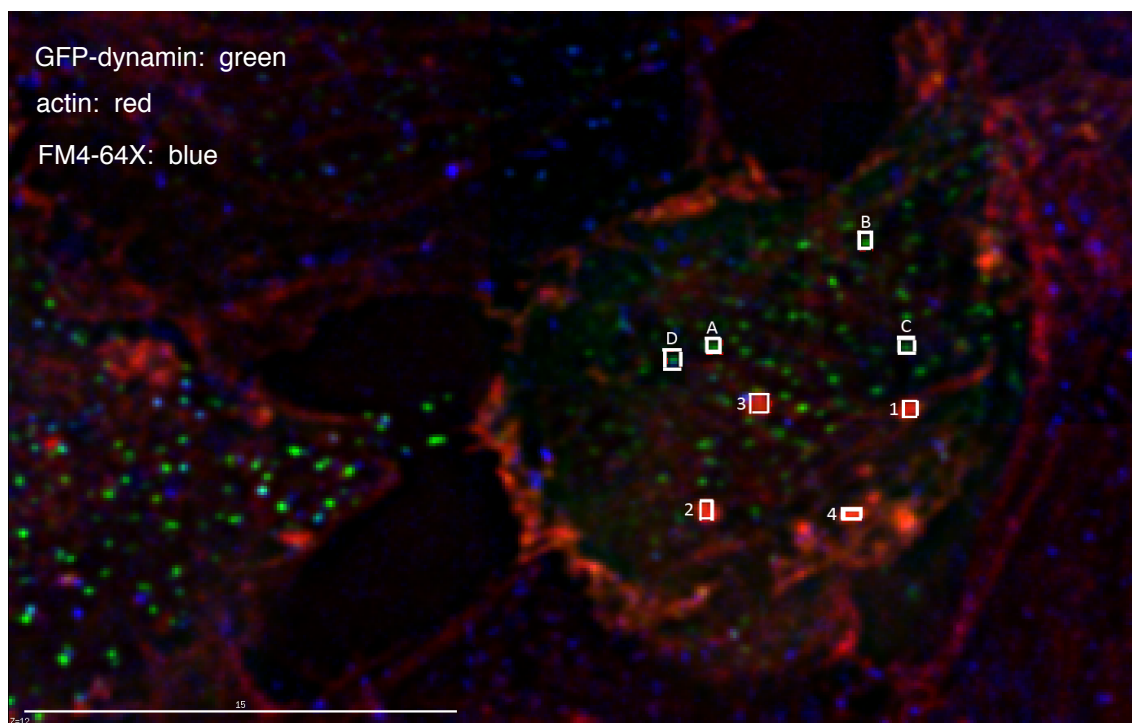

B

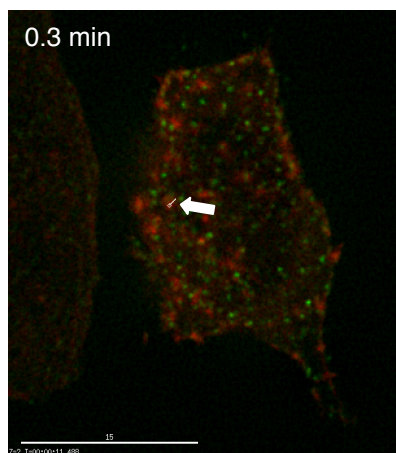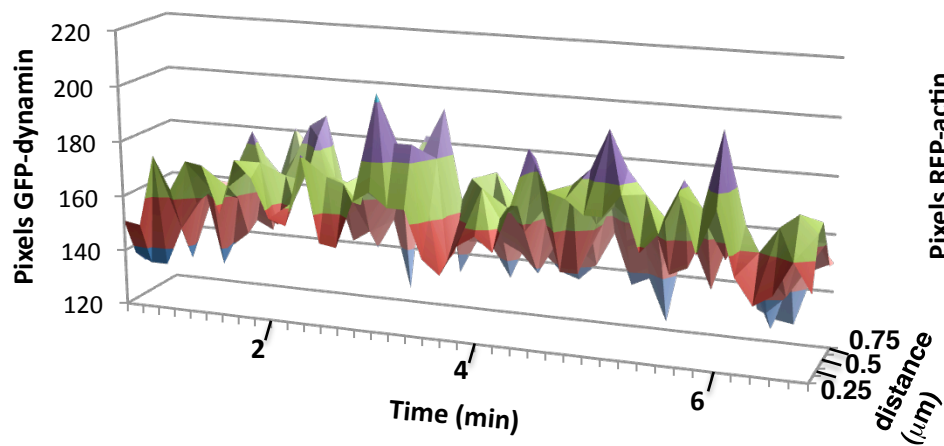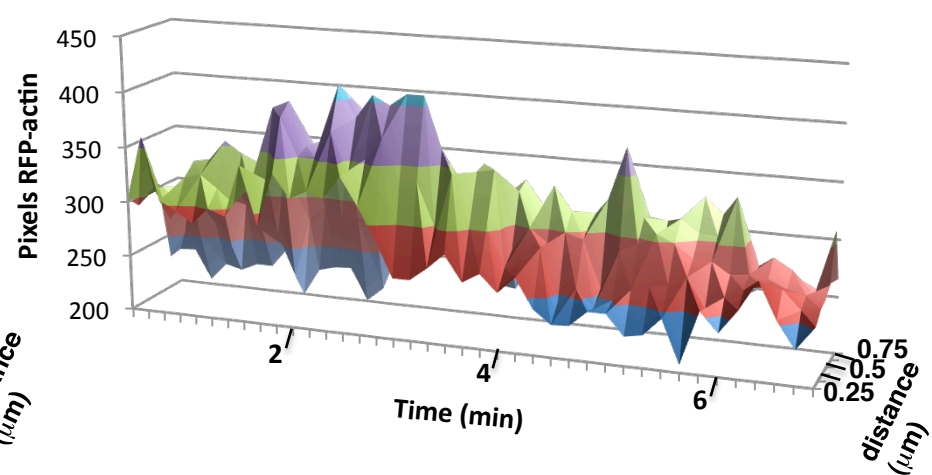

Supplement: E10-06-0514_1.pdf [file E10-06-0514_1.pdf]
